# Supplementary material
Source: MDPI journal article supplement (https://www.mdpi.com/2673-3161/4/1/13)
Supplement: s1 [file s1]

Archive with 1 entries (1 files):
- applmech-2192069-supplementary.pdf
